# Supplementary material
Source: publisher figshare collection journal article supplement (https://acs.figshare.com/ndownloader/files/4721125)
Supplement: Supplementary file 1 [file 4721125]

## Supporting Information - jp064972q

The as-synthesized materials were characterized by FT-IR spectroscopy. The powdered sample was homogeneously mixed with KBr and pressed disks were measured at room temperature. The spectra were collected in a Thermo Nicolet 5700 Fourier transform spectrometer in the range of 400-4000  $\text{cm}^{-1}$  by co-addition of 64 scans at a nominal resolution of 4  $\text{cm}^{-1}$ . The spectra of the samples display typical absorption bands of hydrotalcite-like compounds. The table collects the position of the relevant bands and the corresponding assignments to water, hydroxyls, and carbonate groups, as well as framework vibrations as detailed elsewhere.<sup>1,2</sup> Bands in the carbonate region are very similar in the three samples, suggesting the similar degree of symmetry in the interlayer space of the hydrotalcites. Distinctive is the prominent band at 604  $\text{cm}^{-1}$  in Ni-Al hydrotalcite, which is assigned to Ni-OH translation.<sup>2</sup> This feature appears as a shoulder in Mg-Ni-Al hydrotalcite, which can be expected due to the lower Ni-content, and is obviously absent in Mg-Al hydrotalcite.

1. Miyata, S. *Clays Clay Miner.* **1975**, 23, 369.
2. Kloprogge, J. T.; Frost, R. L. *J. Solid State Chem.* **1999**, 146, 506.

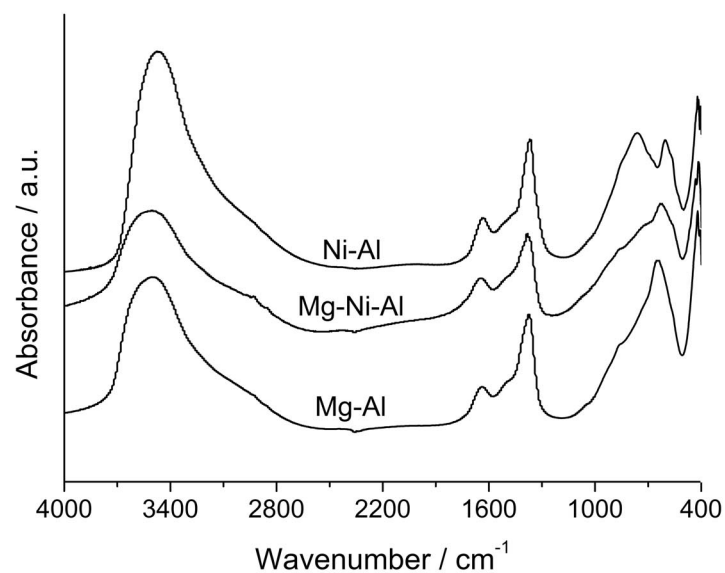

| Group               | Mg-Al-as | Mg-Ni-Al-as | Ni-Al-as | Assignment                                              |
|---------------------|----------|-------------|----------|---------------------------------------------------------|
| Water and hydroxyls | 3507     | 3506        | 3474     | OH stretching                                           |
|                     | 3047     | 3006        | 2929     | H <sub>2</sub> O-CO <sub>3</sub> <sup>2-</sup> bridging |
|                     | 1638     | 1650        | 1638     | OH bending                                              |
| Carbonates          | 1373     | 1383        | 1367     | CO <sub>3</sub> <sup>2-</sup> asymmetric stretching     |
|                     | 864      | 860         | 874      | CO <sub>3</sub> <sup>2-</sup> out-of-plane              |
| Framework           | 1042     | 1056        | 1052     | Al-OH deformation                                       |
|                     | 733, 560 | 713, 554    | 762, 564 | Al-OH translation                                       |
|                     | -        | -           | 604      | Ni-OH translation                                       |
|                     | 648      | 630         | -        | Mg-OH translation                                       |
